# Supplementary material for: Enhanced thermoelectric performance of graphene based nanocomposite coated self-powered wearable e-textiles for energy harvesting from human body heat
Source: Royal Society of Chemistry journal article supplement (doi:10.1039/d0ra10783b), 2021-01-01
Supplement: d0ra10783b1.pdf [file d0ra10783b1.pdf]

## Electronic Supplementary Information (ESI-1)

### Enhanced Thermoelectric Performance of Graphene based Nanocomposites Coated Self-Powered Wearable e-Textiles for Energy Harvesting from Human Body Heat

Nazakat Ali Khoso<sup>1a</sup>, Xie Jiao<sup>1b</sup>, Xue GuangYu<sup>1c</sup>, Sun Tian<sup>3c</sup>, JiaJun Wang<sup>2\*a</sup>,

<sup>1 a, b, c</sup> College of Materials and Textiles, Zhejiang Sci-Tech, University, Zhejiang, Hangzhou, P.R China.

<sup>2\*a</sup> School of Art and Design at Zhejiang Sci-Tech University, Zhejiang Sci-Tech, University, Zhejiang, Hangzhou, P.R China.

<sup>3c</sup> Shanghai Institute of Ceramics, Chinese Academy Sciences (CAS), Shanghai P.R China

\*Corresponding author: [wangjihz@163.com](mailto:wangjihz@163.com)

#### 1. CHARACTERIZATIONS

Nicolet 5700 The elemental analysis of the graphene oxide, reduced graphene oxide, and PEDOT: PSS-rGO were analyzed using FTIR, Raman, XRD and XPS spectroscopy. A K-alpha mode on XPS (Thermofisher USA), X-ray diffraction (XRD), and (XPS) used to describe the rGO, GO, and PEDOT: PSS-rGO films and nano-composites.

##### 1.1 FESEM

The Scanning electron microscopy (SEM) analysis of the sample was performed by using a Zeiss ultra-scanning electron microscope (SEM) for the surface of the treated and untreated fabrics. The electrical performance of the rGO and PEDOT PSS decorated cotton fabric was measured by using a four-point probe (SZT-2B) system (Suzhou Genisis Electronics Co.Ltd., China).

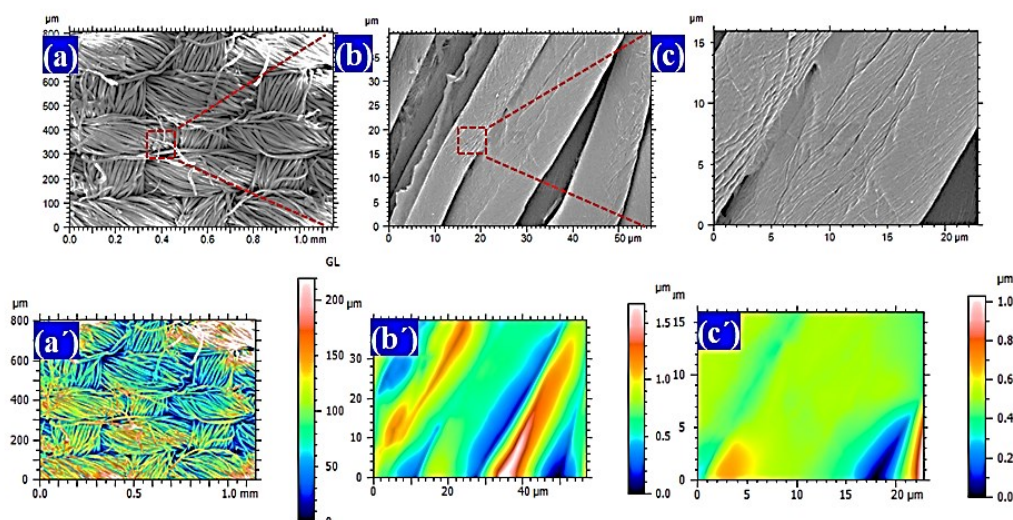

Fig. 1 (a), (b) and (c) FESEM micro graph of PEDOT: PSS-rGO coated cotton fabric at different magnifications, (a'), (b') and (c') IR colour rendering image of respective SEM images

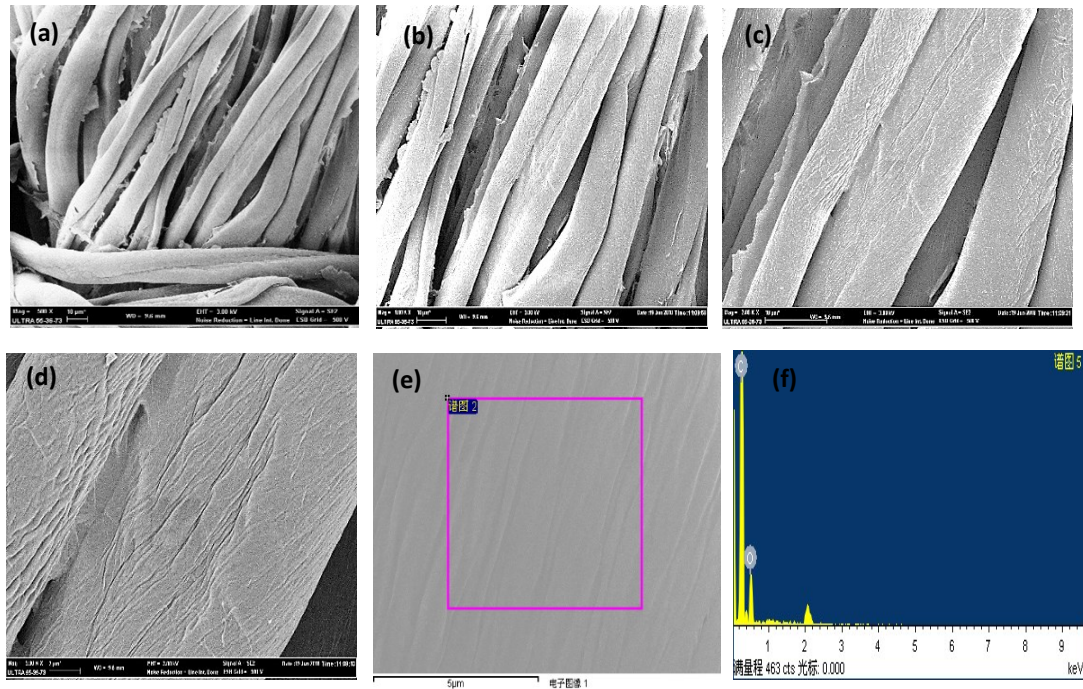

**Fig. 2** (a), (b) and (c) FESEM micro graph of PEDOT: PSS-rGO coated cotton fabric at different magnifications, (d), (e) and (f) SEM with Elemental analysis using EDX respective SEM images

### 1.2 XRD & Rama Spectroscopy

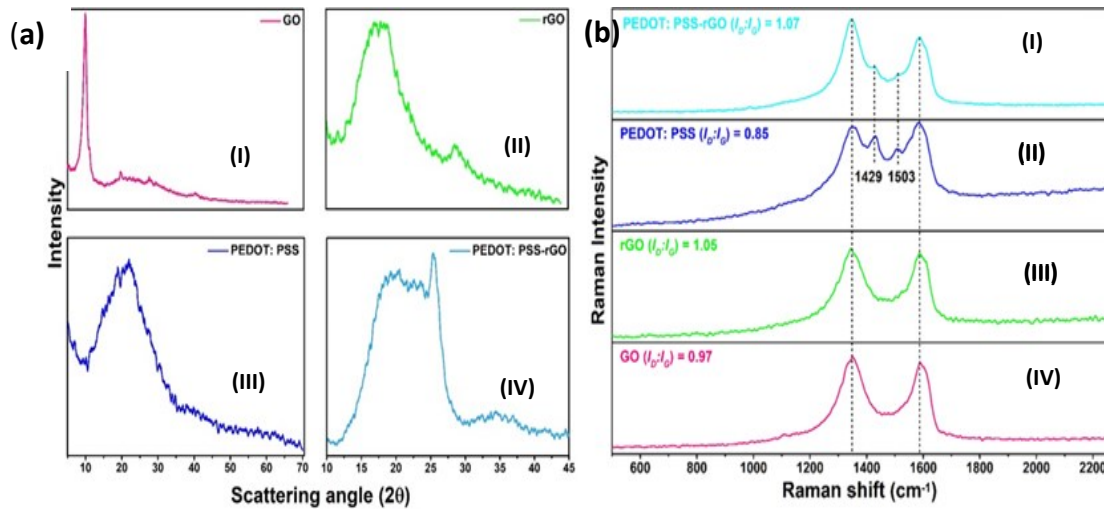

**Figure. 3. a)** XRD analysis of i) rGO/PEDOT: PSS ii) PEDOT: PSS, iii) rGO and iv) GO analysis of rGO/PEDOT: PSS & **Figure.2 b)** i) Raman analysis of Cotton fabric coated, ii) rGO/PEDOT: PSS iii) rGO, and c) GO and iv) Pristine Graphite

### 1.3 XPS Spectroscopy

A K-alpha mode XPS (ThermoFisher USA), X-ray diffraction (XRD) were used to describe the rGO, GO, and PEDOT: PSS-rGO films and nano-composites. The NEXUS-XPS was recorded using an XPS spectrometer with a monochromatic Al K-α source of 1486.68 eV.

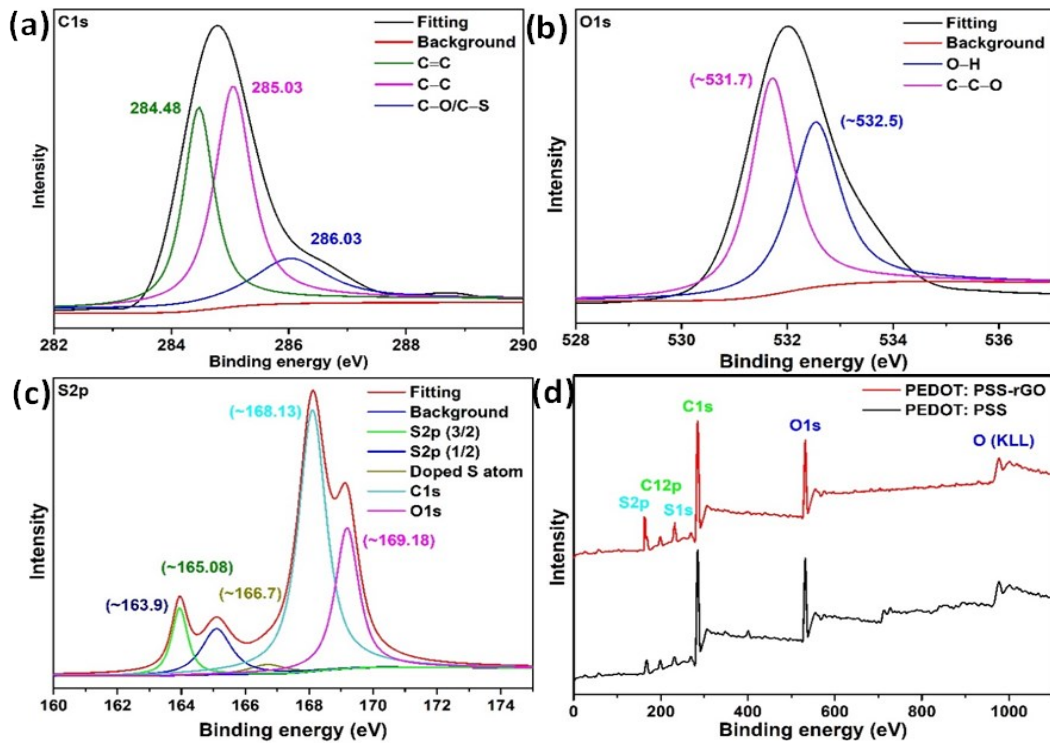

Figure. 4. a) XPS analysis of C (1s) and d) O (1s) spectrum b) Survey peaks

## 2. Measurements

### 2.1 Electrical Performance (Sheet Resistance )

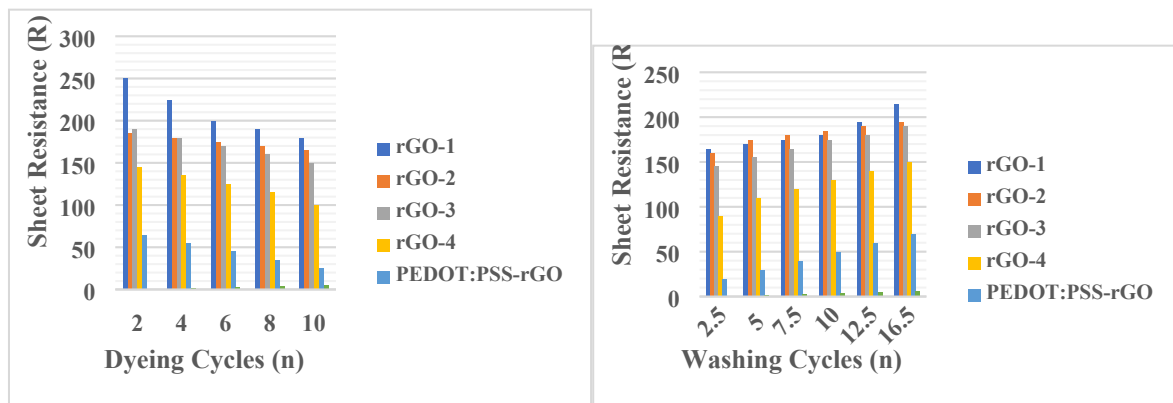

Fig. 5 change in sheet resistance with a) number of padding passes, b) number of washing cycles c) rGO content percent d) change in thermal conductivity with increasing the content percent of rGO

## 2.2 Thermoelectric Performance

### 2.2.1 Seebeck Coefficient and Power Factor

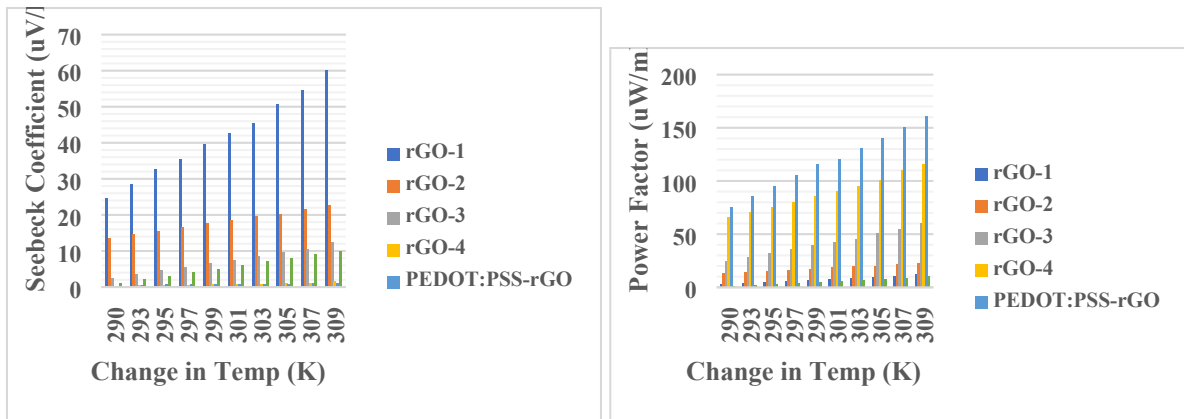

Fig. 6 The change in thermoelectric Seebeck effect due to change in concentration of rGO (W%) and power factor performance of TE device with change in concentration of rGO (W%) b) change in temperature ( $\Delta T$ )/  $^{\circ}\text{K}$

### 2.2.3 Output Power

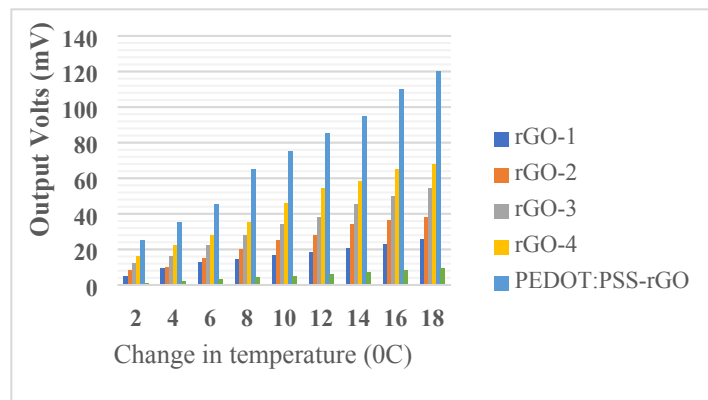

Fig. 7 Output Electric potential of (mV) with temperature gradient of ( $\Delta T$ ) 290-309K

### 2.2.4 Current Vs Voltage Relationship (I-V)

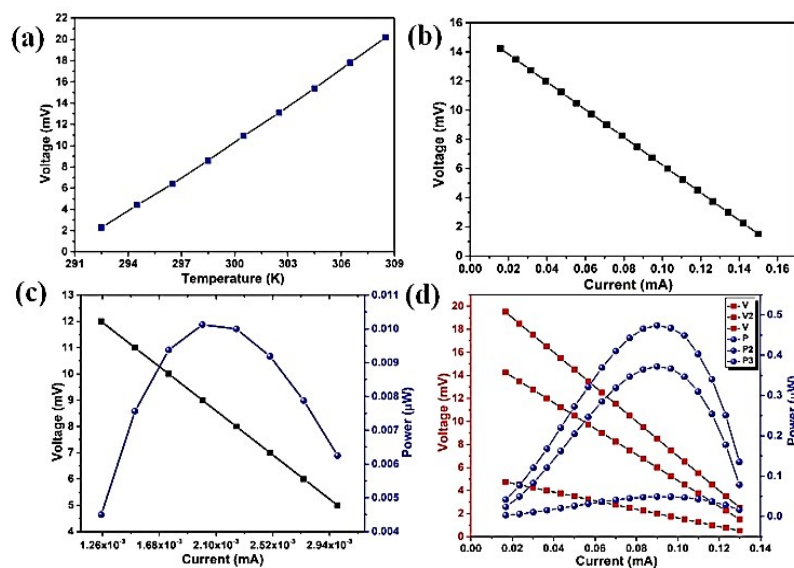

**Fig. 8 a)** Output Electric potential of (mV) with temperature gradient of ( $\Delta T$ ) 290-309K **b)** Current (I-V) relationship **c)** The current Vs Voltage (I-V) and **d)** Current Vs Power relationship between 4 leg and 6, 8 & 10-Leg TE device connected in a parallel arrangement

## 2.3 Textile Properties Performance

### 2.3.1 Water Contact Angle

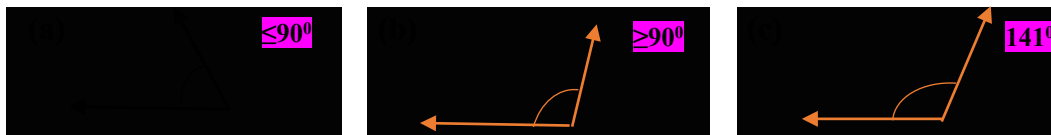

Fig.9 Effect of rGO Content percent on Water contact angle for GO, rGO and PEDOT:PSS-rGO coated cotton fabric

### 2.3.2 Wight pick up (%) and Particle Size

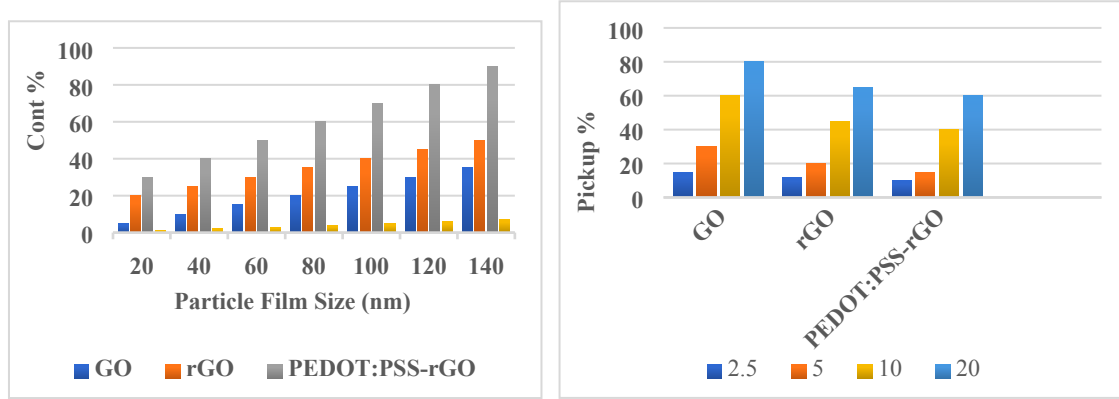

Fig.10 Effect of rGO Content percent on weight pick up% and particle size of GO, rGO and PEDOT:PSS-rGO coated cotton fabric

### 2.3.3 Water Contact Angle and Tensile Strength (mPa)

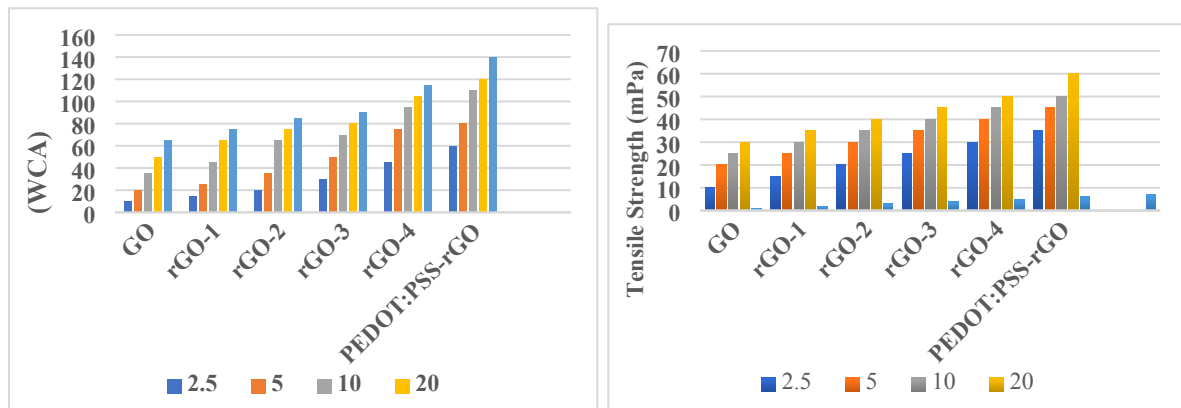

Fig.11 Effect of rGO Content percent on water contact angle and Tensile Strength of GO, rGO and PEDOT:PSS-rGO coated cotton fabric



### 3. Experimental Setup Design Model for Measurements

Thermal conductivity of the fabric using hotplate and Needle Probe based thermocouple

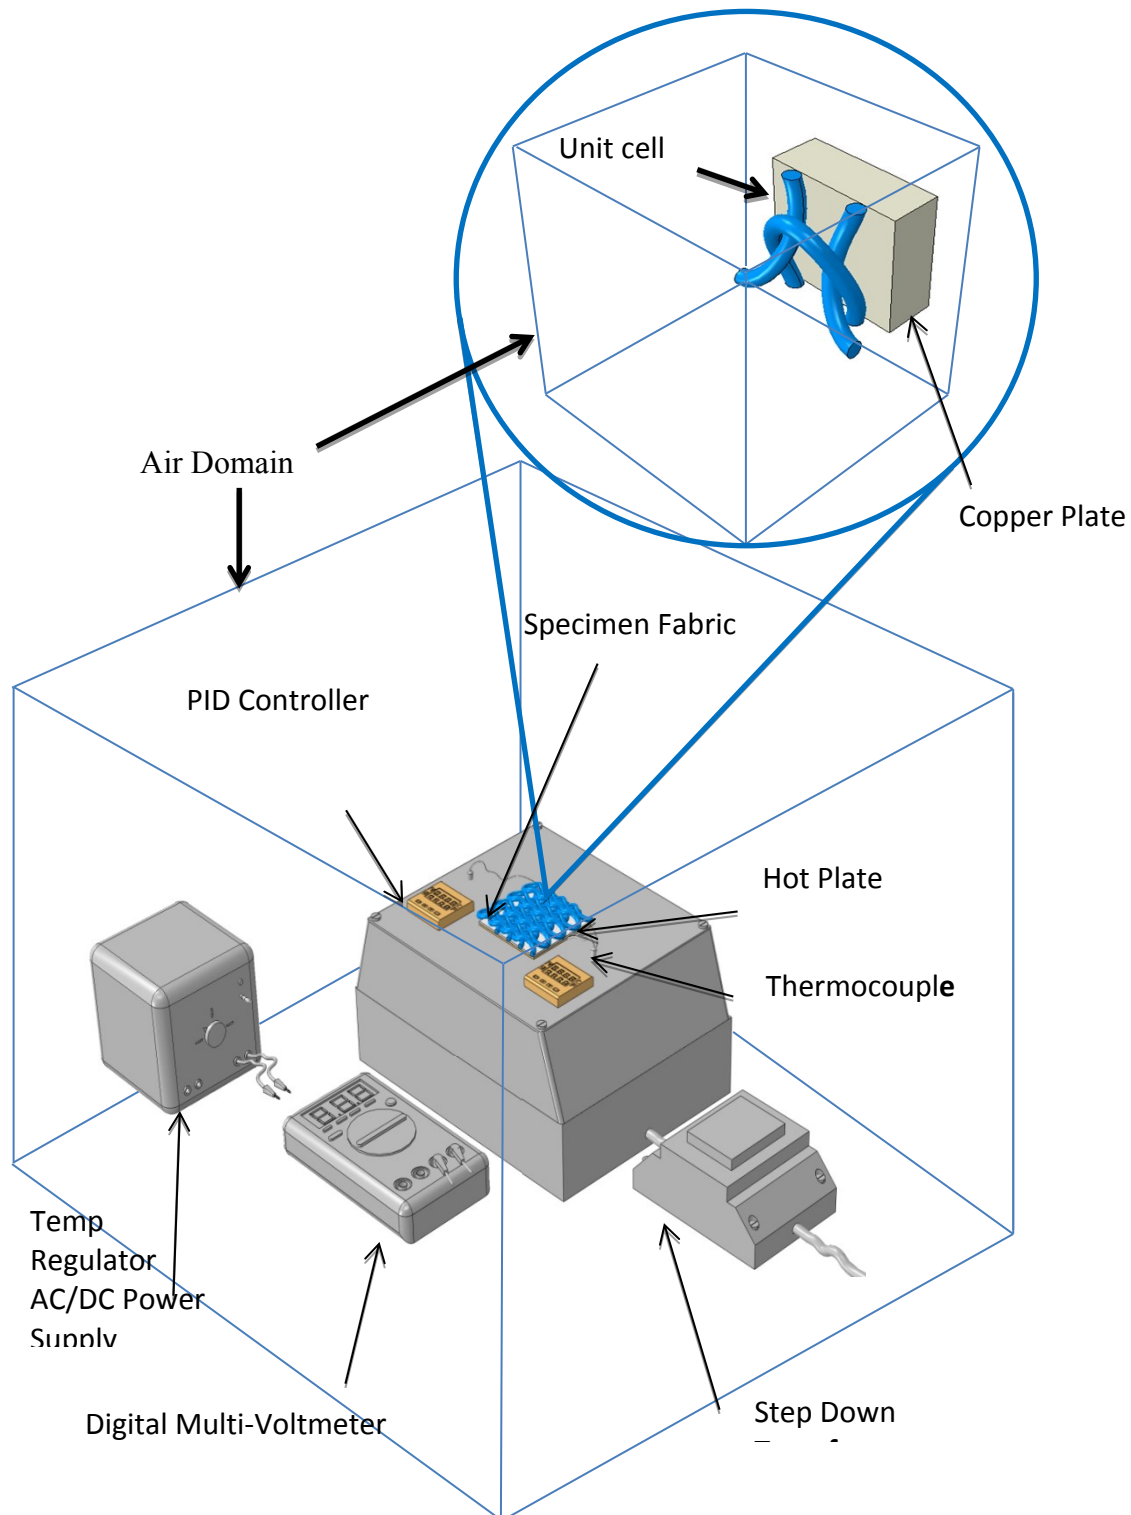

**Fig.12** Measurement Setup for Thermoelectric performance measurement using hot plate, Seebeck setup **Source.** [Adopted from] Dammei Sun .et al. 2015

## Electronic Supplementary Information (ESI-3)

### 4. Characterization

#### 1.1 XPS Elemental Analysis

**Table. 1 Carbon to oxygen (C/O) ratio of XPS analysis of textiles coated with rGO , compared with previously reported work**

| Sample                                            | C (%) | O (%) | C/O  | Ref.      |
|---------------------------------------------------|-------|-------|------|-----------|
| Untreated                                         | 72.9  | 24.1  | 3.02 | [82]      |
| GO                                                | 73.7  | 22.4  | 3.29 | [83]      |
| rGO A.A                                           | 82.8  | 14.2  | 5.83 | [84]      |
| rGO NaBH <sub>4</sub>                             | 78.5  | 20.7  | 3.79 | [85]      |
| rGO H.H                                           | 83.6  | 13.3  | 6.26 | [86]      |
| rGO Na <sub>2</sub> S <sub>2</sub> O <sub>4</sub> | 85.5  | 14.0  | 6.15 | [87]      |
| rGO (A.A) 10% coated 1-3 Dips                     | 83.3  | 16.5  | 4.86 | This work |
| rGO (A.A) 10% coated 3-6 Dips                     | 85.7  | 13.4  | 6.24 | This work |
| rGO (A.A) 10% coated (7-10-Dips)                  | 87.4  | 10.6  | 8.0  | This work |

### 5. Measurements

#### 2.1 Sheet Resistance with Dyeing and Washing Cycles

**Table.2 Sheet Resistance with dyeing Cycles with different weight percent of rGO**

|    | GO | rGO-1 | rGO-2 | rGO-3 | rGO-4 | PEDOT:PSS-rGO |
|----|----|-------|-------|-------|-------|---------------|
| 2  | 10 | 15    | 20    | 30    | 45    | 60            |
| 4  | 20 | 25    | 35    | 50    | 75    | 80            |
| 6  | 35 | 45    | 65    | 70    | 95    | 110           |
| 8  | 50 | 65    | 75    | 80    | 105   | 120           |
| 10 | 65 | 75    | 85    | 90    | 115   | 140           |

**Table.3 Sheet Resistance with Washing Cycles with different weight percent of rGO**

|    | GO | rGO-1 | rGO-2 | rGO-3 | rGO-4 | PEDOT:PSS-rGO |
|----|----|-------|-------|-------|-------|---------------|
| 5  | 10 | 15    | 20    | 25    | 30    | 35            |
| 10 | 20 | 25    | 30    | 35    | 40    | 45            |
| 15 | 25 | 30    | 35    | 40    | 45    | 50            |
| 20 | 30 | 35    | 40    | 45    | 50    | 60            |

#### 2.2 Thermoelectric Performance



**Table. 4 Thermoelectric properties of Conductive polymer and reduced Graphene oxide nanocomposites coated textile device with different wt. % of rGO**

| rGO (w%) | rGO (K $\Omega$ /Sq.) | PEDOT: PSS (K $\Omega$ /Sq.) | PEDOT: PSS-rGO (( $\Omega$ /Sq.) | Seebeck ( $\mu$ V/K) | Power Factor ( $\mu$ Wm <sup>-1</sup> /K <sup>2</sup> ) |
|----------|-----------------------|------------------------------|----------------------------------|----------------------|---------------------------------------------------------|
| 2.5      | 185                   | 115 $\pm$ 5                  | 85 $\pm$ 5                       | 12.5                 | 25                                                      |
| 5.0      | 175                   | 95 $\pm$ 5                   | 75 $\pm$ 5                       | 25.5                 | 78                                                      |
| 10.0     | 145                   | 85 $\pm$ 5                   | 45 $\pm$ 5                       | 50.5                 | 125                                                     |
| 20.0     | 125                   | 65 $\pm$ 5                   | 25 $\pm$ 5                       | 60.5                 | 150                                                     |

### 2.3 Seebeck Coefficient and Power Factor

**Table. 5 Thermoelectric properties of Conductive polymer and reduced Graphene oxide nanocomposites coated textile device with different wt. % of rGO**

| Temp | rGO-1 | rGO-2 | rGO-3 | rGO-4 | PEDOT:PSS-rGO |
|------|-------|-------|-------|-------|---------------|
| 2.5  | 165   | 160   | 145   | 90    | 20            |
| 5.5  | 170   | 175   | 155   | 110   | 30            |
| 7.5  | 175   | 180   | 165   | 120   | 40            |
| 10.5 | 180   | 185   | 175   | 130   | 50            |
| 12.5 | 195   | 190   | 180   | 140   | 60            |
| 16.5 | 215   | 195   | 190   | 150   | 70            |

  

| Temp | rGO-1 | rGO-2 | rGO-3 | rGO-4 | PEDOT:PSS-rGO |
|------|-------|-------|-------|-------|---------------|
| 2.5  | 250   | 200   | 190   | 145   | 65            |
| 5.5  | 238   | 185   | 180   | 135   | 55            |
| 7.5  | 232   | 180   | 170   | 125   | 45            |
| 10.5 | 226   | 175   | 160   | 115   | 35            |
| 12.5 | 215   | 170   | 150   | 100   | 25            |
| 14.5 | 205   | 160   | 145   | 90    | 15            |

### 2.3 Seebeck Coefficient and Output Power (mV)

**Table. 6 Thermoelectric properties of Conductive polymer and reduced Graphene oxide nanocomposites coated textile device with different wt. % of rGO**

| Temp(K) | rGO-1 | rGO-2 | rGO-3 | rGO-4 | PEDOT:PSS-rGO |
|---------|-------|-------|-------|-------|---------------|
| 293     | 0.25  | 0.3   | 2.5   | 13.5  | 24.5          |
| 295     | 0.5   | 0.35  | 3.5   | 14.5  | 28.5          |
| 297     | 0.6   | 0.4   | 4.5   | 15.5  | 32.5          |
| 299     | 0.65  | 0.5   | 5.5   | 16.5  | 35.5          |
| 300     | 0.7   | 0.6   | 6.5   | 17.5  | 39.5          |
| 302     | 0.75  | 0.7   | 7.5   | 18.5  | 42.5          |
| 305     | 0.8   | 0.8   | 8.5   | 19.5  | 45.5          |

|                 |              |              |              |              |                      |
|-----------------|--------------|--------------|--------------|--------------|----------------------|
| <b>307</b>      | 0.85         | 0.9          | 9.5          | 20.0         | 50.5                 |
| <b>309</b>      | 0.9          | 1.0          | 12.5         | 22.5         | 60.5                 |
| <b>TEmp(°C)</b> | <b>rGO-1</b> | <b>rGO-2</b> | <b>rGO-3</b> | <b>rGO-4</b> | <b>PEDOT:PSS-rGO</b> |
| <b>2.5</b>      | 10.5         | 8.0          | 18           | 25           | 35                   |
| <b>5.5</b>      | 12.5         | 15           | 22           | 28           | 45                   |
| <b>7.5</b>      | 14.5         | 20           | 28           | 35           | 65                   |
| <b>10.5</b>     | 16.5         | 25           | 34           | 46           | 75                   |
| <b>12.5</b>     | 18.5         | 28           | 38           | 54           | 85                   |
| <b>14.5</b>     | 20.5         | 34           | 45           | 58           | 95                   |
| <b>16.5</b>     | 22.5         | 36           | 50           | 65           | 120                  |
